## Original Articles

# *p*-Cresyl sulphate has pro-inflammatory and cytotoxic actions on human proximal tubular epithelial cells

Jonay Poveda<sup>1</sup>,  
Maria D. Sanchez-Niño<sup>2</sup>,  
Griet Glorieux<sup>3,4</sup>,  
Ana B. Sanz<sup>1</sup>,  
Jesús Egido<sup>1,5</sup>,  
Raymond Vanholder<sup>3,4</sup>  
and Alberto Ortiz<sup>1,4,5</sup>

<sup>1</sup>IIS-Fundacion Jimenez Diaz-UAM, Madrid, Spain,

<sup>2</sup>IDIPAZ, Madrid, Spain,

<sup>3</sup>Nephrology Section, Ghent University Hospital, Ghent, Belgium,

<sup>4</sup>EUTOX, Montpellier, France and

<sup>5</sup>IRSIN, Madrid, Spain

Correspondence and offprint requests to: Alberto Ortiz, Unidad de Diálisis, Fundación Jiménez Díaz, Avda Reyes Católicos 2, 28040 Madrid, Spain; E-mail: aortiz@fdj.es

Keywords: apoptosis, cell death, fn14, inflammation, tweak, uraemic toxins

### ABSTRACT

**Background.** *p*-Cresyl sulphate (*p*-CS) and *p*-cresyl glucuronide (*p*-CG) are uraemic toxins that exhibit pro-inflammatory features in leukocytes and are associated with the progression of chronic kidney disease (CKD). Tubular cells are key targets of nephrotoxic agents and tubular cell death and activation contribute to the progression of CKD. However, the potential toxicity of these compounds on tubular cells is not fully understood. More specifically, apoptosis has never been studied.

**Methods.** HK-2 human proximal tubular epithelial cells were studied. Cell death was evaluated by flow cytometry of DNA content and by morphology. Gene expression was studied by real-time (RT)-PCR. Protein expression was studied by western blot and flow cytometry.

**Results.** Long-term (7 days) exposure to *p*-CS induced apoptosis in HK-2 cells in a concentration-dependent manner. In addition, short-term (3 h) exposure to *p*-CS promoted the expression of the TWEAK receptor Fn14, cooperated with TWEAK in promoting cell death and increased inflammatory gene expression. Albumin was cytotoxic and increased the inflammatory response to *p*-CS concentrations found in the circulation of non-dialysis CKD patients. In contrast, no

biological actions of *p*-CG were observed on HK-2 cells, either alone or in combination with *p*-CS.

**Conclusions.** This study demonstrates for the first time that *p*-CS has pro-apoptotic and pro-inflammatory effects on tubular cells. These results identify mechanisms by which uraemic toxicity may contribute to CKD progression.

### INTRODUCTION

Uraemic toxins are molecules excreted or metabolized by normal kidneys that progressively accumulate in chronic kidney disease (CKD) and exert an adverse biological effect on a biological system [1–3]. Uraemic toxicity derived from the accumulation of these molecules has received attention as both a potential cause for the excess of cardiovascular disease and mortality observed in CKD and as a potential contributor to the progression of CKD itself [4, 5]. Among the uraemic retention solutes, protein-bound compounds such as the *p*-cresol conjugates *p*-cresyl sulphate (*p*-CS) and *p*-cresyl glucuronide (*p*-CG) have attracted most interest in recent years due to their poor clearance by conventional dialysis and their potential toxicity [6].

Observational studies have linked systemic inflammation to cardiovascular events and mortality in CKD [7]. *p*-CS is pro-inflammatory by activating leukocyte free radical production [8, 9] and plays a role in endothelial microparticle release, an indirect indicator of vascular damage [10]. In contrast, *p*-CG *per se* exerts no pro-inflammatory activity on leukocytes, but it enhances free radical generation induced by *p*-CS in these cells [9], indicating the potential for synergism among uraemic toxins.

A hallmark of advanced CKD is progression, even when the original cause of CKD is no longer active. The molecular mechanisms have not been totally unravelled. Local factors such as loss of parenchymal renal cells, the presence of inflammatory cells and fibrosis, activation of kidney cells and infiltrating leukocytes, haemodynamic factors and others may have a role [11]. In this regard, there is evidence for a role of uraemic toxins in the process. The use of the intestinal adsorbent AST-120 that binds uraemic toxins and the use of peritoneal dialysis as renal replacement therapy have been associated with slower progression of CKD [12–16]. Peritoneal dialysis is associated with lower toxin concentration than haemodialysis [17–19]. Decreased tubular injury has been described in AST-120-treated patients, suggesting that tubular cells may be targets of uraemic toxins [16]. In this regard, *p*-CS levels predict CKD progression [5]. *p*-CS may also be involved in renal fibrosis via epithelial-to-mesenchymal transition induced by the renin–angiotensin system [20]. Further studies also revealed that *p*-CS suppresses the transcription of the renal-secreted hormone Klotho through hypermethylation of the gene in renal tubular cells [21].

We have now explored the effects of the uraemic toxins *p*-CS and *p*-CG on cultured human proximal tubular cell apoptosis and inflammatory phenotype. *p*-CS, but not *p*-CG, was found to enhance apoptosis. In addition, *p*-CS, but not *p*-CG, promoted a pro-inflammatory phenotype in human tubular cells.

## METHODS

### Cells and reagents

HK-2 human proximal tubular epithelial cells (ATCC, Rockville, MD) were grown on Roswell Park Memorial Institute (RPMI) 1640 (Life Technologies, Grand Island, NY) with 10% heat-inactivated fetal bovine serum, 2 mM glutamine, 100 U/mL penicillin, 100 µg/mL streptomycin, 5 µg/mL insulin, 5 µg/mL transferrin, 5 ng/mL sodium selenite and 5 ng/mL hydrocortisone in 5% carbon dioxide at 37°C [22]. For experiments, cells were rested in serum-free media 24 h prior to the addition of *p*-CS, *p*-CG or their respective control salts and throughout the experiment. Ten thousand cells were seeded for flow cytometry experiments, while 200 000 cells were seeded for RNA extraction and western blot. Bovine serum albumin (Sigma-Aldrich, Co., St. Louis, MO) was added at a concentration of 40 mg/mL in some experiments. This is the concentration found in serum and may be present in proximal tubular fluid in proteinuric states.

Two experimental settings were explored: (i) addition of toxins or vehicle and collection of cells or supernatants at 3 to

48 h, (ii) addition of fresh toxin- or vehicle-containing medium every 48 h and collection of cells at Day 7.

The *p*-CS potassium salt and the *p*-CG ammonium salt were synthesized and purified as previously reported [9]. The purity of both *p*-CS and *p*-CG was checked by liquid chromatography–mass spectrometry and nuclear magnetic resonance. The concentrations at which both compounds were added ranged from 1 to 500 µg/mL in the case of *p*-CS and 25 or 50 µg/mL for *p*-CG, with 105 and 24 µg/mL being the maximum serum concentrations found in a haemodialysis population [9]. Equimolar potassium chloride and ammonium chloride solution were used as control (vehicle).

### Cell death

Apoptosis was characterized by morphological and functional criteria. Nuclei of formalin-fixed cells were stained with 4',6-diamidino-2-phenylindole (DAPI) (Sigma-Aldrich) to observe the typical morphological changes, as previously described [23]. For assessment of apoptosis by flow cytometry, 10 000 cells were seeded in 12-well plates (Costar, Cambridge, MA) in 10% fetal calf serum (FCS) RPMI overnight. They were rested in serum-free medium for 24 h. Thereafter, *p*-CS or *p*-CG was added to subconfluent cells. Then, adherent cells were pooled with spontaneously detached cells, and incubated in 100 µg/mL propidium iodide (PI), 0.05% NP-40, 10 µg/mL RNase A in PBS at 4°C for >3 h. This assay permeabilizes the cells, thus PI stains both live and dead cells. The percentage of apoptotic cells with decreased DNA staining (hypodiploid cells) was counted by flow cytometry using BD CellQuest Software (BD Biosciences, San Jose, CA) [24, 25].

### RNA extraction and real-time polymerase chain reaction

For RNA extraction, 200 000 cells were seeded in 60-mm cell culture dishes (BD, Franklin Lakes, NJ) in 10% FCS RPMI overnight. They were rested in serum-free medium for 24 h and *p*-CS or *p*-CG was added to subconfluent cells. Three hours later cells were rinsed once with 1 mL of ice cold saline and then total RNA was extracted from cells by the TRI Reagent method (Roche, Mannheim, Germany). This time point was chosen because inflammatory responses in proximal tubular cells are usually observed within this time-frame [26, 27]. One microgram RNA was reverse transcribed with a High Capacity cDNA Archive kit (Applied Biosystems, Foster City, CA). Pre-developed primer and probe assays for MCP-1, CXCL16, RANTES, Fn14 and 18S were obtained from Applied Biosystems. A quantitative PCR was performed by 7500 Real-Time PCR System with the Prism 7000 System SDS Software (Applied Biosystems) and RNA expression of different genes was corrected for 18S [26].

### Cell surface Fn14 expression

For assessment of Fn14 expression by flow cytometry, 10 000 cells were seeded in 12-well plates (Costar, Cambridge, MA) in 10% FCS RPMI overnight. They were rested in serum-free medium for 24 h. Thereafter, *p*-CS was added to subconfluent cells and 24 h later they were detached with 2 mM EDTA/1% bovine serum albumin (BSA) in PBS, washed and resuspended in PBS/1% BSA for 4 min. Then, cells

were incubated with a 1 µg/mL anti-Fn14 ITEM4 antibody (eBioscience, San Diego, CA) or an isotype-matched control antibody for 30 min on ice. Cells were washed twice, blocked in PBS/1% BSA for 4 min and incubated with an Alexa488-labelled goat anti-mouse IgG antibody (1/300, Invitrogen, Carlsbad, CA) for 45 min on ice in the dark. Following two additional washes with PBS/1%BSA, cells were resuspended in 1% filtered paraformaldehyde in PBS and analysed by flow cytometry using BD CellQuest Software (BD Biosciences) [28].

### Western blot

For western blot analysis, 200 000 cells were seeded in 60-mm cell culture dishes (BD, Franklin Lakes, NJ) in 10% FCS RPMI overnight. They were rested in serum-free medium for 24 h. Thereafter, *p*-CS was added to subconfluent cells and 24 h later, cells were detached with a scrapper. Cell samples were homogenized in lysis buffer (50 mM Tris-HCl, 150 mM NaCl, 2 mM EDTA, 2 mM EGTA, 0.2% Triton X-100, 0.3% NP-40, 0.1 mM PMSF and 1 µg/mL pepstatin A), then separated by 15% sodium dodecyl sulphate-polyacrylamide gel electrophoresis (SDS-PAGE) under reducing conditions. After electrophoresis, samples were transferred to PVDF membranes (Millipore, Billerica, MA), blocked with 5% BSA in PBS/0.5% v/v Tween 20 for 1 h, washed with PBS/Tween and incubated with rabbit polyclonal anti-Fn14 (1:1000, Cell Signaling, Danvers, MA). Anti-Fn14 was diluted in 1% BSA PBS/Tween. Blots were washed with PBS/Tween and incubated with appropriate horseradish peroxidase-conjugated secondary antibody (1:2000, Amersham, Aylesbury, UK). After washing with PBS/Tween blots were developed using the chemiluminescence method (ECL) (Amersham). Blots were then probed with a mouse monoclonal anti-β-actin antibody (1:2000, SIGMA-ALDRICH) and levels of expression were corrected for minor differences in loading [29].

### Statistics

Statistical analysis was performed using SPSS 11.0 statistical software. Results are expressed as mean ± SEM. Significance at the  $P < 0.05$  level was assessed by Student's *t* test for two groups of data and ANOVA for three or more groups.

## RESULTS

### *p*-CS promotes human proximal tubular cell death

In order to determine the biological activity of uraemic toxins, tubular cells were exposed to different concentrations of *p*-CS (1 to 500 µg/mL) for 24 h, and the percentage of hypodiploid apoptotic cells was analysed by flow cytometry (Figure 1A). We observed no significant changes in the percentage of apoptotic cells at either 24 h (Figure 1A) or 48 h (not shown), although a trend was observed towards increased cytotoxicity for the higher *p*-CS concentrations. Since *in vivo* tubular cells are chronically exposed to uraemic toxins, we redesigned the experiment by adding *p*-CS or *p*-CG every other day for a week (Figure 1B). We observed an increment in the apoptotic rate in cells exposed to 100 µg/mL *p*-CS or higher concentrations. Albumin was toxic to tubular epithelium, as

previously described [30], and *p*-CS did not increase the cytotoxicity over that of albumin (Figure 1B). Apoptotic morphology was confirmed by DAPI staining that disclosed fragmented, bright nuclei among cells exposed to *p*-CS (Figure 1C). In contrast, *p*-CG alone was not lethal (Figure 1D) and did not modulate the toxicity of *p*-CS (not shown).

### *p*-CS increases expression of the TWEAK receptor Fn14 and TWEAK-induced apoptosis in proximal tubular cells

HK2 cells were exposed to 100 µg/mL *p*-CS or 25 µg/mL *p*-CG for 3 h and then analysed for Fn14 mRNA expression (Figure 2A). This time point was chosen because of prior knowledge of Fn14 biology [23]. Fn14 is encoded by an early response gene and protein expression after cytokine stimulation occurs at this time point. Addition of *p*-CS increased Fn14 mRNA expression, whereas no changes were observed in *p*-CG-treated cells. *p*-CS also increased Fn14 protein expression as assessed either by flow cytometry, which denotes the presence of Fn14 on the cell membrane (Figure 2B and C), or by western blot of whole cell lysates (Figure 2D). Increased Fn14 expression induced by *p*-CS sensitized cells to death in the presence of TWEAK in short-term, 24-h experiments (Figure 3).

### *p*-CS is pro-inflammatory in proximal tubular cells

To study whether uraemic toxins triggered inflammation, we evaluated the effect of these molecules on the expression profile of the chemokines MCP-1, CXCL16 and RANTES. Exposure to 100 µg/mL *p*-CS significantly increased the gene expression of the three chemokines (Figure 4). In contrast, no differences were observed in *p*-CG-treated cells. Lower concentrations of *p*-CS, similar to those found in the circulation of non-dialysis CKD patients (50 µg/mL) [31] increased the mRNA expression of the chemokines MCP-1 and CXCL16 in the presence of albumin (Figure 5A and B). The reason for the albumin requirement is unclear. However, *p*-CS binds albumin and albumin is present in the tubular lumen of patients with progressive CKD, where it is known to be uptaken and to stress tubular cells [30]. At this concentration, *p*-CS did not promote RANTES expression (Figure 5C). Although both MCP-1 and RANTES expression by proximal tubular cells is dependent on NFκB [26], transcription of the RANTES gene requires a more persistent activation of this transcription factor since DNA should be made accessible before NFκB activation wanes [27].

## DISCUSSION

The main findings of our study were that in human proximal tubular epithelial cells *p*-CS promotes cell death, increases the expression of the TWEAK receptor Fn14 and promotes inflammatory gene expression. These findings suggest that *p*-CS may contribute to CKD progression by promoting tubular cell injury.

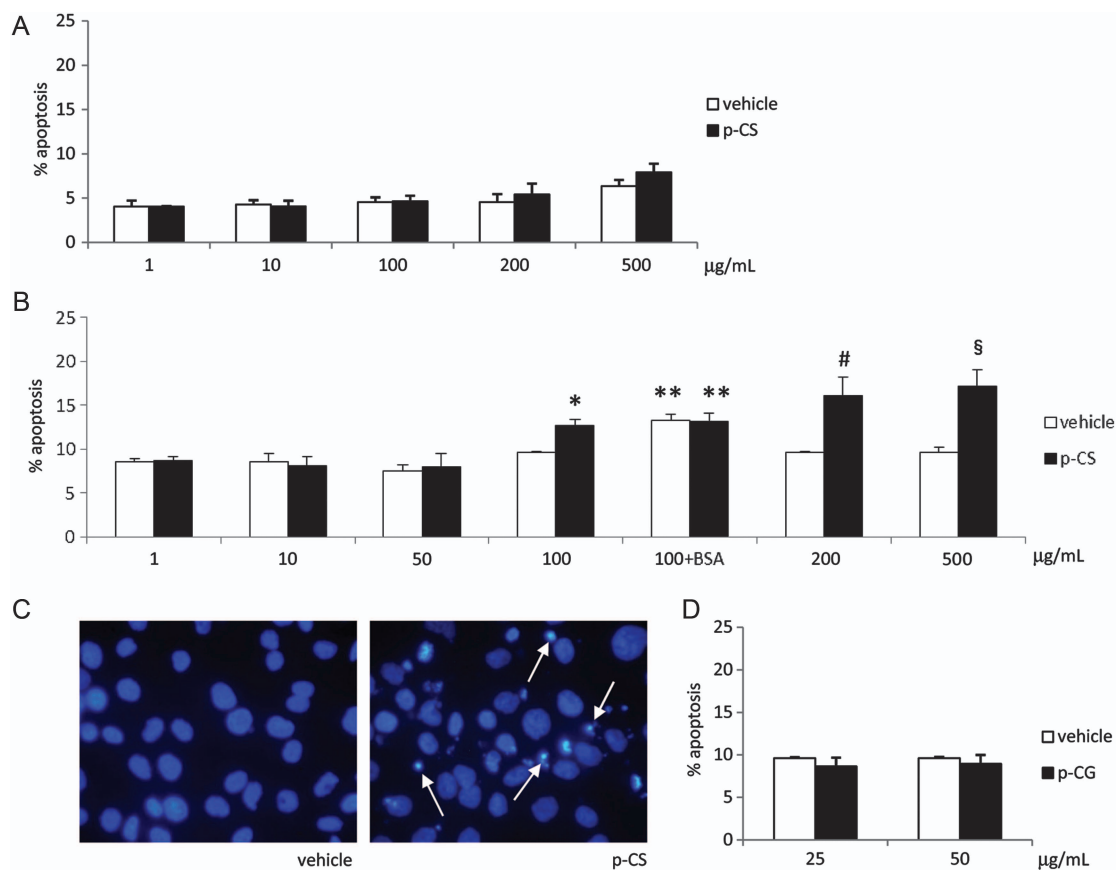

**FIGURE 1:** *p*-CS has a pro-apoptotic effect on human proximal tubular HK2 cells. HK2 cells were exposed to 1–500 µg/mL *p*-CS or 25–50 µg/mL *p*-CG. Cells were permeabilized and stained with PI to quantify hypodiploid nuclei by flow cytometry in A, B and D. (A) *p*-CS displayed little cytotoxicity regardless of dose at 24 h.  $n = 3$  (B) When the cells were exposed to *p*-CS for 1 week, a statistically significant increase in apoptosis was observed in cells treated with 100 µg/mL *p*-CS or higher concentrations (\* $P < 0.005$  versus vehicle, \*\* $P < 0.05$  versus non-albumin vehicle, # $P < 0.02$  versus vehicle, § $P < 0.01$  versus vehicle). Since the toxins were added as *p*-CS potassium salt and *p*-CG ammonium salt, equimolar potassium chloride and ammonium chloride solutions were used as control (vehicle),  $n = 3$ . (C) Apoptotic morphology was observed after addition of 500 µg/mL *p*-CS for 1 week by DAPI staining. Representative experiment. (D) No excess apoptosis was observed after addition of *p*-CG. The vehicle used was KCl for *p*-CS and  $\text{NH}_4\text{Cl}$  for *p*-CG experiments.  $n = 3$ .

Proximal tubular cells are key cells for normal kidney structure and function. Selective depletion of proximal tubular cells leads to acute kidney injury evolving to kidney fibrosis [32]. Tubular cells are key cells in tubulointerstitial inflammation. In response to an adverse microenvironment, tubular cells are activated to express chemotactic and proinflammatory molecules, including cytokines such as TNF, Fas ligand, TRAIL and TWEAK and chemokines such as MCP-1, RANTES and CXCL16 that decisively contribute to recruit inflammatory cells and to promote kidney injury [26, 33–35]. After a long focus on the glomerulus as a key target of diabetic and non-diabetic nephropathy, recently there has been considerable interest in the role of tubules [36, 37]. Indeed, tubular cells were the first kidney cells described to undergo apoptosis in a high-glucose milieu [38]. In this regard, tubulointerstitial damage correlates better with the outcome of renal function than glomerular injury scores, even for primary glomerulonephritis [39, 40].

*p*-CS was cytotoxic to cultured tubular cells, promoting apoptosis. This effect was not observed for *p*-CG at the

concentrations tested. The increase of tubular cell death and inflammation by *p*-CS is relatively mild. However, chronic inflammation and loss of tubular cells in CKD are mild, persistent conditions that lead to slow progression of CKD over months to years. In addition, the present data were obtained by means of subacute experiments with an exposition lasting for only 7 days. A more prolonged *in vivo* exposure may lead to more persistent and progressive injury. In this regard, other sources of inflammatory cytokines released in the CKD milieu may cooperate with uraemic toxins to promote tubular cell death or inflammation. Thus, the combination of TWEAK and uraemic toxin further increased cell death. Furthermore, tubular cells are targets of additional nephrotoxic agents, including contrast media, non-steroidal anti-inflammatory agents or over-the-counter medications such as paracetamol that may also cooperate in tubular injury [41–43]. The array of cell membrane transporters of tubular cells facilitates entry and accumulation of nephrotoxins in proximal tubular cells. Examples include the accumulation and toxicity of anti-retroviral drugs that cause both acute kidney injury and

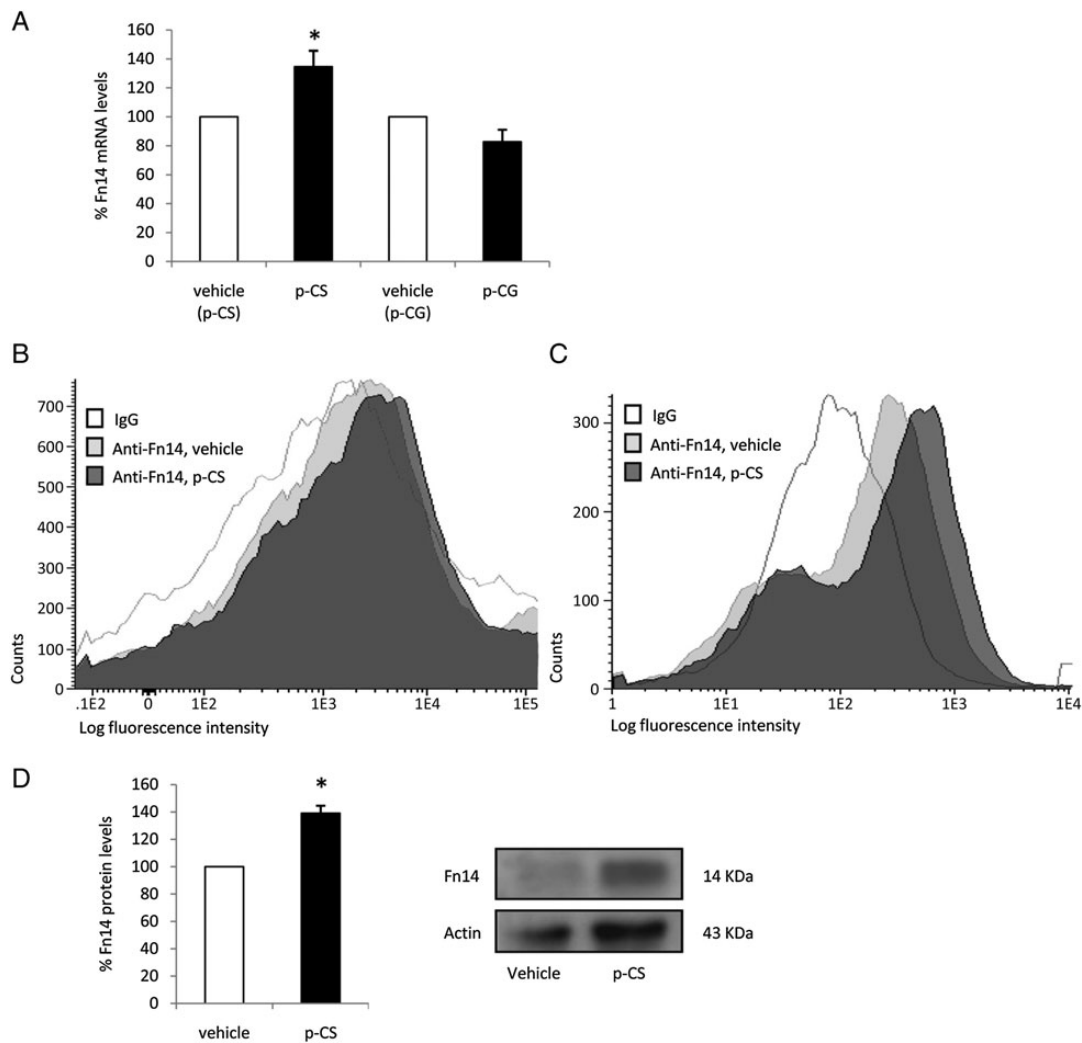

**FIGURE 2:** *p-CS* increases expression of the TWEAK receptor Fn14 and TWEAK-induced apoptosis in human proximal tubular HK2 cells. (A) HK2 cells were treated with 100 µg/mL *p-CS*, *p-CG* 25 µg/mL or their vehicles for 3 h. RNA was reverse transcribed and analysed by quantitative PCR. Fn14 mRNA expression was increased by *p-CS* but not by *p-CG* (\* $P < 0.03$  versus vehicle).  $n = 3$ . HK2 cells were treated with 100 µg/mL (B) or 200 µg/mL (C) *p-CS* for 24 h and then collected and stained with anti-Fn14 or control IgG. Membrane expression of Fn14 was measured by flow cytometry.  $n = 2$ . (D) HK2 cells were treated with 100 µg/mL *p-CS* for 24 h. Western blot of total cell protein shows an increased Fn14 expression in *p-CS*-treated cells (\* $P < 0.002$  versus vehicle). The vehicle used was KCl for *p-CS* and  $\text{NH}_4\text{Cl}$  for *p-CG* experiments.  $n = 3$ .

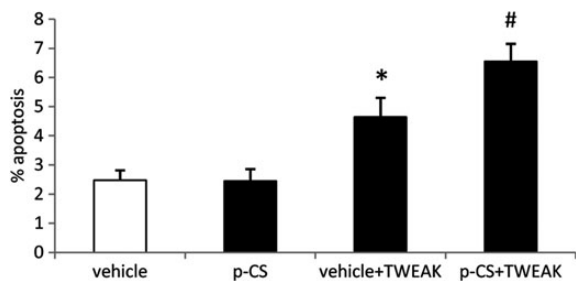

**FIGURE 3:** Cooperation of *p-CS* and cytokines to promote tubular cell death. HK2 cells were treated with 100 ng/mL TWEAK and 200 µg/mL *p-CS* for 24 h and cell death quantified by flow cytometry of DNA content. Cells were permeabilized and stained with PI to quantify hypodiploid nuclei by flow cytometry (\* $P < 0.02$  versus vehicle, # $P < 0.03$  versus vehicle + TWEAK)  $n = 3$ .

CKD such as cidofovir and tenofovir [44, 45]. The same transporters may contribute to accumulation of *p-CS* or *p-CG* in tubular cells. Thus, *p-CS* is actively transported into proximal tubular cells potentially contributing to intracellular accumulation and potential adverse biological effects [46]. In very short-term studies, there was evidence for active uptake of *p-CS* that was linear for 10–15 min with later stabilization [46]. Serum concentrations of *p-CS* and *p-CG* are markedly increased in uraemic patients compared with healthy subjects [9]. The total pre-dialysis concentration of *p-CS* is higher than that of *p-CG*. Prolonged *in vivo* exposure to the very high levels of uraemic toxins found in advanced CKD may result in intracellular accumulation and toxicity of the compounds.

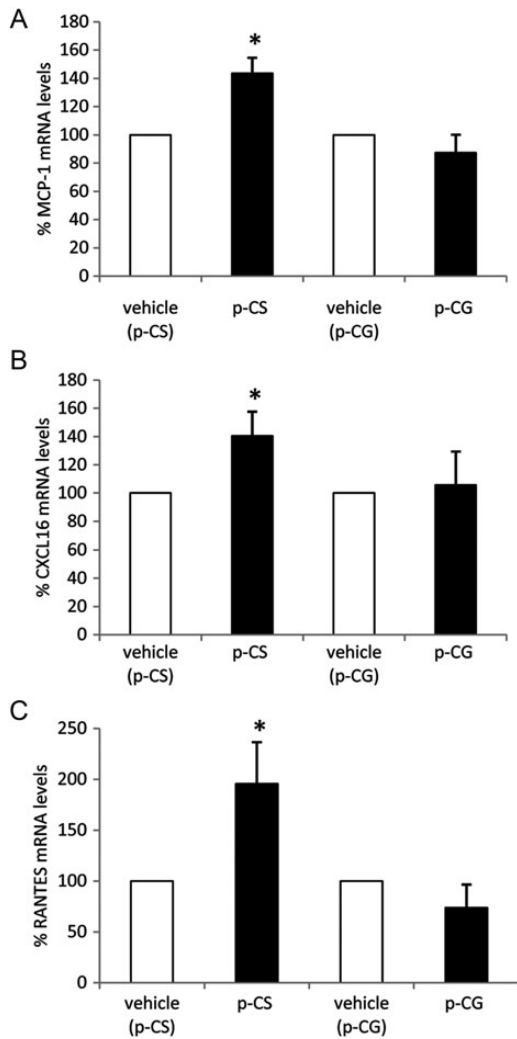

**FIGURE 4:** *p*-CS is proinflammatory for human proximal tubular cells. HK2 cells were treated with 100  $\mu$ g/mL *p*-CS, 25  $\mu$ g/mL *p*-CG or vehicle for 3 h. Gene expression was analysed by quantitative RT-PCR. *p*-CS increased expression of (A) MCP-1, (B) CXCL16 and (C) RANTES mRNA. \* $P < 0.05$  versus vehicle control.  $n = 3$ .

The pro-inflammatory role of these toxins had been previously studied in leukocytes and overall findings are consistent with those observed in tubular cells. *p*-CS enhanced the percentage of free radical-producing leucocytes at baseline, while *p*-CG was inert [47]. However, both toxins cooperated in promoting free radical production in leukocytes, while *p*-CG did not add to the pro-inflammatory or lethal effect of *p*-CS when tested simultaneously in tubular cells. These toxins may also directly damage the endothelium [10] and promote smooth muscle cell proliferation [48], which may explain their association with cardiovascular disease in the CKD population [47, 49–51]. In this regard, enhancing the removal and/or decreasing the concentration of these protein-bound solutes might slow progression of CKD [52, 53]. Thus, administration of *p*-CS to mice promoted kidney fibrosis, modulated the epigenetics of the *Klotho* gene and decreased tubular *Klotho* expression. In addition, *p*-CS also decreased *Klotho* expression in cultured

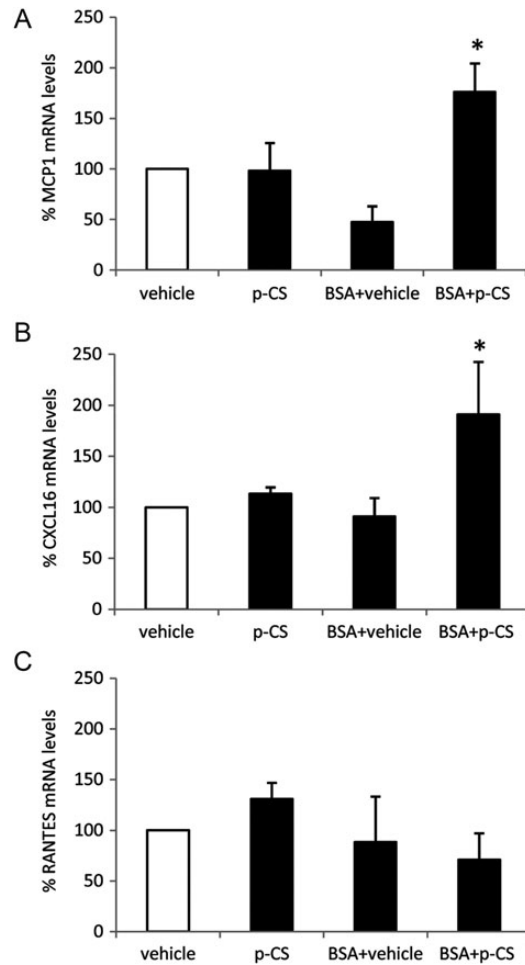

**FIGURE 5:** In human proximal tubular cells *p*-CS is proinflammatory in the presence of albumin at concentrations found in the circulation of non-dialysis CKD patients. HK2 cells were treated with 50  $\mu$ g/mL *p*-CS, or vehicle with or without 40 mg/mL BSA for 3 h. Gene expression was analysed by quantitative RT-PCR. At this *p*-CS concentration, only the *p*-CS/BSA combination was proinflammatory and increased the mRNA expression of (A) MCP-1 and (B) CXCL16. (C) RANTES mRNA. \* $P < 0.05$  versus vehicle control.  $n = 3$ . We certify that there is no conflict of interest with any financial organization regarding the material discussed in the manuscript.

tubular cells [21]. *Klotho* is a kidney secreted anti-ageing hormone and also a receptor for fibroblast growth factor-23 (FGF-23). *Klotho* possesses antioxidant, anti-inflammatory, antifibrotic and cytoprotective properties [54–56]. *Klotho* expression by kidney tubular cells had been previously shown to be downregulated by inflammatory cytokines in cell culture and *in vivo* [57]. Specifically, the inflammatory cytokine TWEAK downregulated *Klotho* expression through NF $\kappa$ B binding to the *Klotho* promoter and through epigenetic modulation of the gene. *p*-CS upregulation of the TWEAK receptor Fn14 could contribute to the downregulation of *Klotho* expression by uraemic toxins *in vivo*. In this regard, the TWEAK/Fn14 system is regulated mainly by levels of expression of the Fn14 receptor [58] and has been shown to be

a key promoter of tubular cell death and inflammation in the course of nephrotoxic AKI [26]. More recently, *p*-CS was shown to cause oxidative stress and to promote a fibrogenic response in tubular epithelium [59].

Another uraemic toxin, indoxyl sulphate, has adverse effects on tubular cells that include oxidative stress, inhibition of cell proliferation, apoptosis, promotion of inflammation and secretion of profibrotic factors such as TGF- $\beta$ 1 and epithelial-to-mesenchymal transition of renal tubular cells [60–66]. Since both indoxyl sulphate and *p*-CS are present in the uraemic milieu it is conceivable that they may interact or cooperate to promote kidney injury. In this regard both indoxyl sulphate and *p*-CS have been suggested to be transported into proximal tubular cells by organic anion transporters [46, 62, 67], although this view has been disputed [68].

The clinical relevance of these findings rests on the observation that clinically relevant concentrations of *p*-CS induced proximal tubular cell stress, manifested as an inflammatory response or death. At *p*-CS concentrations found in non-dialysis CKD patients [5, 31, 47], a proinflammatory response was observed in the presence of albumin. Albuminuria is a frequent feature of progressive CKD, has tubulotoxic actions and may accelerate progression of kidney disease [30]. At *p*-CS concentrations found in dialysis patients, a proapoptotic response was observed. The relevance of tubular cell loss in dialysis patients may be disputed. However, tubular cells have an endocrine function that includes activation of vitamin D and secretion of Klotho. Maintenance of this endocrine function may be beneficial for dialysis patients. In fact, residual renal function preservation is associated with improved outcomes in dialysis [69].

The concentration ranges studied were 1–500  $\mu\text{g}/\text{mL}$  *p*-CS and 25 or 50  $\mu\text{g}/\text{mL}$  for *p*-CG. The total serum levels of *p*-CS and *p*-CG in healthy volunteers were  $2.87 \pm 1.71$  and  $0.35 \pm 0.03$   $\mu\text{g}/\text{mL}$  and in the haemodialysis population reached up to 105 and 24  $\mu\text{g}/\text{mL}$ , respectively [9, 70]. These values correspond to free *p*-CS 16.3  $\mu\text{g}/\text{mL}$  and free *p*-CG 22.4  $\mu\text{g}/\text{mL}$ . There is very little information on *p*-CS values in patients with non-dialysis CKD. An analysis of 10 CKD Stage 5 patients disclosed mean (SD) *p*-CS levels of 29 (17)  $\mu\text{g}/\text{mL}$  [31]. That is, 16% of patients had values  $>46$   $\mu\text{g}/\text{mL}$ . Additional authors described *p*-CS levels 2.5-fold higher in CKD Stage 1–5 progressors versus non-progressors [5]. The interaction between albumin and *p*-CS may take several hypothetical forms that may impact the *in vivo* effects of *p*-CS on proximal tubular cells. *p*-CS will bind to albumin decreasing the available free *p*-CS fraction. However, uptake of albumin by proximal tubular cells may facilitate *p*-CS entry into the cells, especially in the presence of albuminuria. Finally, there might be additional interactions between the biological activities on proximal tubular cells of albumin and of *p*-CS.

In conclusion, *p*-CS has proapoptotic and pro-inflammatory effects on human proximal tubular epithelial cells, which may cooperate with other stressors such as the inflammatory cytokine TWEAK to promote progression of CKD.

## ACKNOWLEDGMENTS

Grant support: ISCIII and FEDER funds FIS PS09/00447, CP07/0020, PI08/1083, PI081564, ISCIII-RETIC REDinREN/RD06/0016 and RD12/0021, RECAVA, Lilly, Comunidad de Madrid/CIFRA/S2010/BMD-2378, EUTOX. Salary support: FIS to MDSN (Sara Borrell) and ABS (Miguel Servet), MECED to JP, Programa Intensificación Actividad Investigadora (ISCIII/Agencia Laín-Entralgo/CM) to AO.

## CONFLICT OF INTEREST STATEMENT

None declared.

## REFERENCES

1. Vanholder R, De SR. Pathophysiologic effects of uremic retention solutes. *J Am Soc Nephrol* 1999; 10: 1815–1823
2. Vanholder R, De SR, Hsu C *et al*. Uremic toxicity: the middle molecule hypothesis revisited. *Semin Nephrol* 1994; 14: 205–218
3. Duranton F, Cohen G, De SR *et al*. Normal and pathologic concentrations of uremic toxins. *J Am Soc Nephrol* 2012; 23: 1258–1270
4. Neiryck N, Vanholder R, Schepers E *et al*. An update on uremic toxins. *Int Urol Nephrol* 2013; 45: 139–150
5. Wu IW, Hsu KH, Lee CC *et al*. *p*-Cresyl sulphate and indoxyl sulphate predict progression of chronic kidney disease. *Nephrol Dial Transplant* 2011; 26: 938–947
6. Vanholder R, Schepers E, Pletinck A *et al*. An update on protein-bound uremic retention solutes. *J Ren Nutr* 2012; 22: 90–94
7. Ortiz A, Massy ZA, Fliser D *et al*. Clinical usefulness of novel prognostic biomarkers in patients on hemodialysis. *Nat Rev Nephrol* 2012; 8: 141–150
8. Schepers E, Meert N, Glorieux G *et al*. *p*-Cresylsulphate, the main *in vivo* metabolite of *p*-cresol, activates leucocyte free radical production. *Nephrol Dial Transplant* 2007; 22: 592–596
9. Meert N, Schepers E, Glorieux G *et al*. Novel method for simultaneous determination of *p*-cresylsulphate and *p*-cresylglucuronide: clinical data and pathophysiological implications. *Nephrol Dial Transplant* 2012; 27: 2388–2396
10. Meijers BK, Van KS, Verbeke K *et al*. The uremic retention solute *p*-cresyl sulfate and markers of endothelial damage. *Am J Kidney Dis* 2009; 54: 891–901
11. Ruggenti P, Cravedi P, Remuzzi G. Mechanisms and treatment of CKD. *J Am Soc Nephrol* 2012; 23: 1917–1928
12. Hatakeyama S, Yamamoto H, Okamoto A *et al*. Effect of an oral adsorbent, AST-120, on dialysis initiation and survival in patients with chronic kidney disease. *Int J Nephrol* 2012; 2012: 376128
13. Shoji T, Wada A, Inoue K *et al*. Prospective randomized study evaluating the efficacy of the spherical adsorptive carbon AST-120 in chronic kidney disease patients with moderate decrease in renal function. *Nephron Clin Pract* 2007; 105: c99–c107

14. Konishi K, Nakano S, Tsuda S *et al.* AST-120 (Kremezin) initiated in early stage chronic kidney disease stunts the progression of renal dysfunction in type 2 diabetic subjects. *Diabetes Res Clin Pract* 2008; 81: 310–315
15. Berlanga JR, Marron B, Reyero A *et al.* Peritoneal dialysis retardation of progression of advanced renal failure. *Perit Dial Int* 2002; 22: 239–242
16. Nakamura T, Sato E, Fujiwara N *et al.* Oral adsorbent AST-120 ameliorates tubular injury in chronic renal failure patients by reducing proteinuria and oxidative stress generation. *Metabolism* 2011; 60: 260–264
17. Vanholder R, Meert N, Van BW *et al.* Why do patients on peritoneal dialysis have low blood levels of protein-bound solutes? *Nat Clin Pract Nephrol* 2009; 5: 130–131
18. Pham NM, Recht NS, Hostetter TH *et al.* Removal of the protein-bound solutes Indican and *p*-cresol sulfate by peritoneal dialysis. *Clin J Am Soc Nephrol* 2008; 3: 85–90
19. Evenepoel P, Bammens B, Verbeke K *et al.* Superior dialytic clearance of beta(2)-microglobulin and *p*-cresol by high-flux hemodialysis as compared to peritoneal dialysis. *Kidney Int* 2006; 70: 794–799
20. Sun CY, Chang SC, Wu MS. Uremic toxins induce kidney fibrosis by activating intrarenal renin-angiotensin-aldosterone system associated epithelial-to-mesenchymal transition. *PLoS One* 2012; 7: e34026
21. Sun CY, Chang SC, Wu MS. Suppression of Klotho expression by protein-bound uremic toxins is associated with increased DNA methyltransferase expression and DNA hypermethylation. *Kidney Int* 2012; 81: 640–650
22. Sanchez-Nino MD, Sanz AB, Ihalmo P *et al.* The MIF receptor CD74 in diabetic podocyte injury. *J Am Soc Nephrol* 2009; 20: 353–362
23. Justo P, Sanz AB, Sanchez-Nino MD *et al.* Cytokine cooperation in renal tubular cell injury: the role of TWEAK. *Kidney Int* 2006; 70: 1750–1758
24. Sanchez-Nino MD, Sanz AB, Lorz C *et al.* BASP1 promotes apoptosis in diabetic nephropathy. *J Am Soc Nephrol* 2010; 21: 610–621
25. Lorz C, Ortiz A, Justo P *et al.* Proapoptotic Fas ligand is expressed by normal kidney tubular epithelium and injured glomeruli. *J Am Soc Nephrol* 2000; 11: 1266–1277
26. Sanz AB, Justo P, Sanchez-Nino MD *et al.* The cytokine TWEAK modulates renal tubulointerstitial inflammation. *J Am Soc Nephrol* 2008; 19: 695–703
27. Sanz AB, Sanchez-Nino MD, Ramos AM *et al.* NF-kappaB in renal inflammation. *J Am Soc Nephrol* 2010; 21: 1254–1262
28. Molano A, Lakhani P, Aran A *et al.* TWEAK stimulation of kidney resident cells in the pathogenesis of graft versus host induced lupus nephritis. *Immunol Lett* 2009; 125: 119–128
29. Ortiz A, Lorz C, Catalan MP *et al.* Expression of apoptosis regulatory proteins in tubular epithelium stressed in culture or following acute renal failure. *Kidney Int* 2000; 57: 969–981
30. Baines RJ, Brunskill NJ. Tubular toxicity of proteinuria. *Nat Rev Nephrol* 2011; 7: 177–180
31. Eiloot S, Schepers E, Barreto DV *et al.* Estimated glomerular filtration rate is a poor predictor of concentration for a broad range of uremic toxins. *Clin J Am Soc Nephrol* 2011; 6: 1266–1273
32. Grgic I, Campanholle G, Bijol V *et al.* Targeted proximal tubule injury triggers interstitial fibrosis and glomerulosclerosis. *Kidney Int* 2012; 82: 172–183
33. Izquierdo MC, Sanz AB, Mezzano S *et al.* TWEAK (tumor necrosis factor-like weak inducer of apoptosis) activates CXCL16 expression during renal tubulointerstitial inflammation. *Kidney Int* 2012; 81: 1098–1107
34. Lorz C, Benito A, Ucero AC *et al.* Trail and kidney disease. *Front Biosci* 2009; 14: 3740–3749
35. Lorz C, Benito-Martin A, Boucherot A *et al.* The death ligand TRAIL in diabetic nephropathy. *J Am Soc Nephrol* 2008; 19: 904–914
36. Bonventre JV. Can we target tubular damage to prevent renal function decline in diabetes? *Semin Nephrol* 2012; 32: 452–462
37. Lowenstein J. The angler fish and uremic toxins. *FASEB J* 2011; 25: 1781–1785
38. Ortiz A, Ziyadeh FN, Neilson EG. Expression of apoptosis-regulatory genes in renal proximal tubular epithelial cells exposed to high ambient glucose and in diabetic kidneys. *J Investig Med* 1997; 45: 50–56
39. Rodriguez-Iturbe B, Johnson RJ, Herrera-Acosta J. Tubulointerstitial damage and progression of renal failure. *Kidney Int Suppl* 2005; 99: S82–S86
40. Rodriguez-Iturbe B, Garcia GG. The role of tubulointerstitial inflammation in the progression of chronic renal failure. *Nephron Clin Pract* 2010; 116: c81–c88
41. Lorz C, Justo P, Sanz A *et al.* Paracetamol-induced renal tubular injury: a role for ER stress. *J Am Soc Nephrol* 2004; 15: 380–389
42. Lorz C, Justo P, Sanz AB *et al.* Role of Bcl-xL in paracetamol-induced tubular epithelial cell death. *Kidney Int* 2005; 67: 592–601
43. Fored CM, Ejerblad E, Lindblad P *et al.* Acetaminophen, aspirin, and chronic renal failure. *N Engl J Med* 2001; 345: 1801–1808
44. Ortiz A, Justo P, Sanz A *et al.* Tubular cell apoptosis and cidofovir-induced acute renal failure. *Antivir Ther* 2005; 10: 185–190
45. Fernandez-Fernandez B, Montoya-Ferrer A, Sanz AB *et al.* Tenofovir nephrotoxicity: 2011 update. *AIDS Res Treat* 2011; 2011: 354908
46. Miyamoto Y, Watanabe H, Noguchi T *et al.* Organic anion transporters play an important role in the uptake of *p*-cresyl sulfate, a uremic toxin, in the kidney. *Nephrol Dial Transplant* 2011; 26: 2498–2502
47. Liabeuf S, Barreto DV, Barreto FC *et al.* Free *p*-cresylsulphate is a predictor of mortality in patients at different stages of chronic kidney disease. *Nephrol Dial Transplant* 2010; 25: 1183–1191
48. Yamamoto H, Tsuruoka S, Ioka T *et al.* Indoxyl sulfate stimulates proliferation of rat vascular smooth muscle cells. *Kidney Int* 2006; 69: 1780–1785
49. Wang CP, Lu LF, Yu TH *et al.* Serum levels of total *p*-cresylsulphate are associated with angiographic coronary atherosclerosis severity in stable angina patients with early stage of renal failure. *Atherosclerosis* 2010; 211: 579–583
50. Barreto FC, Barreto DV, Liabeuf S *et al.* Serum indoxyl sulfate is associated with vascular disease and mortality in chronic kidney disease patients. *Clin J Am Soc Nephrol* 2009; 4: 1551–1558



51. Meijers BK, Bammens B, De MB *et al.* Free *p*-cresol is associated with cardiovascular disease in hemodialysis patients. *Kidney Int* 2008; 73: 1174–1180
52. Ueda H, Shibahara N, Takagi S *et al.* AST-120, an oral adsorbent, delays the initiation of dialysis in patients with chronic kidney diseases. *Ther Apher Dial* 2007; 11: 189–195
53. Akizawa T, Asano Y, Morita S *et al.* Effect of a carbonaceous oral adsorbent on the progression of CKD: a multicenter, randomized, controlled trial. *Am J Kidney Dis* 2009; 54: 459–467
54. Izquierdo MC, Perez-Gomez MV, Sanchez-Nino MD *et al.* Klotho, phosphate and inflammation/ageing in chronic kidney disease. *Nephrol Dial Transplant* 2012; 27: iv6–iv10
55. Sanchez-Nino MD, Sanz AB, Ortiz A. Klotho to treat kidney fibrosis. *J Am Soc Nephrol* 2013; 24: 687–689
56. Carracedo J, Buendia P, Merino A *et al.* Klotho modulates the stress response in human senescent endothelial cells. *Mech Ageing Dev* 2012; 133: 647–654
57. Moreno JA, Izquierdo MC, Sanchez-Nino MD *et al.* The inflammatory cytokines TWEAK and TNFalpha reduce renal klotho expression through NFkappaB. *J Am Soc Nephrol* 2011; 22: 1315–1325
58. Sanz AB, Sanchez-Nino MD, Ortiz A. TWEAK, a multifunctional cytokine in kidney injury. *Kidney Int* 2011; 80: 708–718
59. Watanabe H, Miyamoto Y, Honda D *et al.* *p*-Cresyl sulfate causes renal tubular cell damage by inducing oxidative stress by activation of NADPH oxidase. *Kidney Int* 2013; 83: 582–592
60. Shimizu H, Yisireyli M, Higashiyama Y *et al.* Indoxyl sulfate upregulates renal expression of ICAM-1 via production of ROS and activation of NF-kappaB and p53 in proximal tubular cells. *Life Sci* 2013; 92: 143–148
61. Shimizu H, Bolati D, Higashiyama Y *et al.* Indoxyl sulfate upregulates renal expression of MCP-1 via production of ROS and activation of NF-kappaB, p53, ERK, and JNK in proximal tubular cells. *Life Sci* 2012; 90: 525–530
62. Kim SH, Yu MA, Ryu ES *et al.* Indoxyl sulfate-induced epithelial-to-mesenchymal transition and apoptosis of renal tubular cells as novel mechanisms of progression of renal disease. *Lab Invest* 2012; 92: 488–498
63. Shimizu H, Yisireyli M, Nishijima F *et al.* Indoxyl Sulfate Enhances p53-TGF-beta(1)-Smad3 pathway in proximal tubular cells. *Am J Nephrol* 2013; 37: 97–103
64. Sun CY, Hsu HH, Wu MS. *p*-Cresol sulfate and indoxyl sulfate induce similar cellular inflammatory gene expressions in cultured proximal renal tubular cells. *Nephrol Dial Transplant* 2013; 28: 70–78
65. Bolati D, Shimizu H, Higashiyama Y *et al.* Indoxyl sulfate induces epithelial-to-mesenchymal transition in rat kidneys and human proximal tubular cells. *Am J Nephrol* 2011; 34: 318–323
66. Shimizu H, Bolati D, Adijiang A *et al.* Senescence and dysfunction of proximal tubular cells are associated with activated p53 expression by indoxyl sulfate. *Am J Physiol Cell Physiol* 2010; 299: C1110–C1117
67. Taki K, Nakamura S, Miglinas M *et al.* Accumulation of indoxyl sulfate in OAT1/3-positive tubular cells in kidneys of patients with chronic renal failure. *J Ren Nutr* 2006; 16: 199–203
68. Mutsaers HA, Wilmer MJ, van den Heuvel LP *et al.* Basolateral transport of the uraemic toxin *p*-cresyl sulfate: role for organic anion transporters? *Nephrol Dial Transplant* 2011; 26: 4149
69. Marron B, Remon C, Perez-Fontan M *et al.* Benefits of preserving residual renal function in peritoneal dialysis. *Kidney Int Suppl* 2008; 108: S42–S51
70. Vanholder R, Bammens B, de LH *et al.* Warning: the unfortunate end of *p*-cresol as a uraemic toxin. *Nephrol Dial Transplant* 2011; 26: 1464–1467

Received for publication: 1.4.2013; Accepted in revised form: 24.7.2013
